# Supplementary material for: Classification of Infected Necrotizing Pancreatitis for Surgery Within or Beyond 4 Weeks Using Machine Learning
Source: PubMed Central journal article supplement (PMC7287166; doi:10.3389/fbioe.2020.00541), 2020-06-04
Supplement: Data_Sheet_1.pdf [file Data_Sheet_1.pdf]

## Supplementary Material

**Supplementary Figure 1.** The diagnosis and intervention of infected necrotizing pancreatitis.

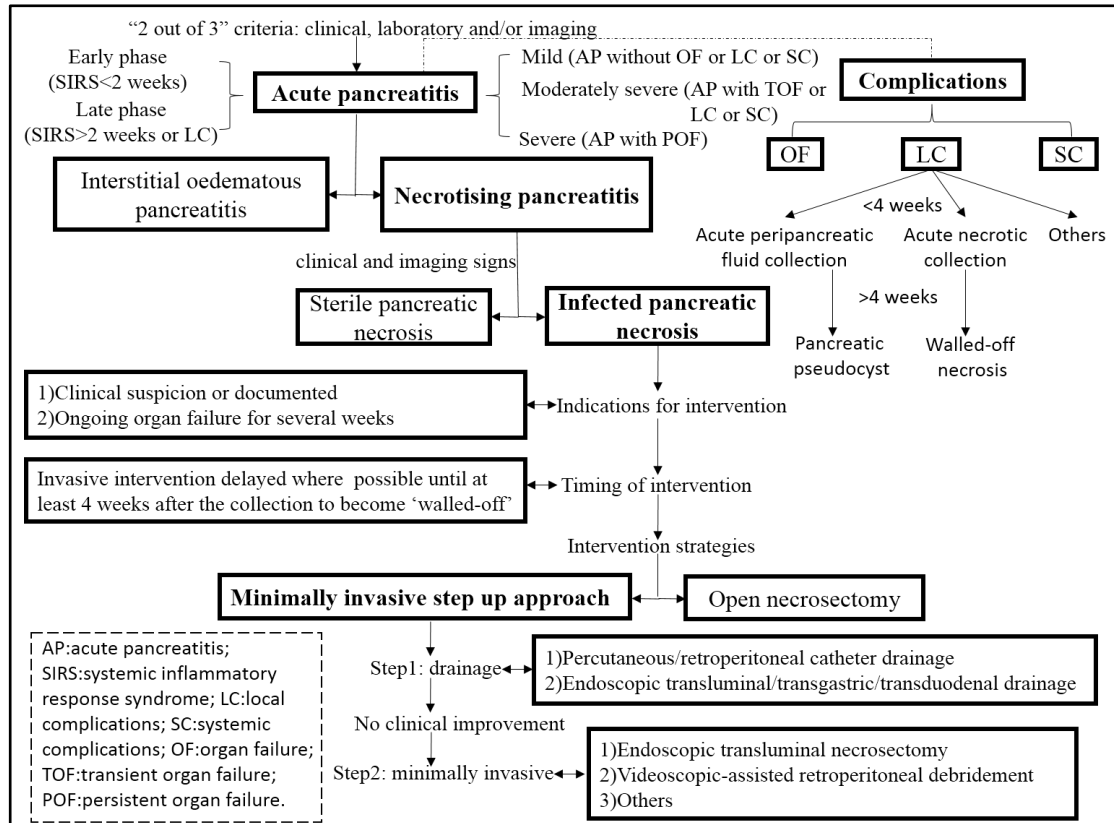

**Supplementary Table 1.** Preoperational organ failure analyses for survived patients after early (<4 weeks) or delayed surgery ( $\geq 4$  weeks).

| POF                                     | All <sup>a</sup><br>(N=186) | <4 weeks <sup>b</sup><br>(N=73) | $\geq 4$ weeks <sup>b</sup><br>(N=113) | p     |
|-----------------------------------------|-----------------------------|---------------------------------|----------------------------------------|-------|
| POF, N(%)                               | 79(42.47)                   | 34(46.58)                       | 45(39.82)                              | 0.363 |
| Number of organ failure systems         |                             |                                 |                                        |       |
| One organ system, N(%)                  | 55(69.62)                   | 20(58.82)                       | 35(77.78)                              |       |
| Two organ systems, N(%)                 | 18(22.78)                   | 9(26.47)                        | 9(20.00)                               | 0.099 |
| Three organ systems, N(%)               | 6(7.59)                     | 5(14.71)                        | 1(2.22)                                |       |
| Pulmonary failure, N(%)                 | 73(39.25)                   | 34(46.58)                       | 39(34.51)                              | 0.100 |
| Renal failure, N(%)                     | 20(10.75)                   | 12(16.44)                       | 8(7.08)                                | 0.044 |
| Circulatory failure, N(%)               | 16(8.60)                    | 7(9.59)                         | 9(7.96)                                | 0.700 |
| Onset of POF                            |                             |                                 |                                        |       |
| First week(>48 hours), N(%)             | 72(92.31)                   | 34(100)                         | 38(86.36)                              |       |
| Second week, N(%)                       | 3(3.85)                     | 0(0)                            | 3(6.82)                                | 0.102 |
| Third or fourth week, N(%)              | 0(0)                        | 0(0)                            | 0(0)                                   |       |
| Fifth week or later, N(%)               | 3(3.85)                     | 0(0)                            | 3(6.82)                                |       |
| Onset of pulmonary failure,<br>M(IQR)   | 3(3)                        | 3(1)                            | 3(3)                                   | 0.101 |
| Onset of renal failure, M(IQR)          | 2(1)                        | 3(1)                            | 2(1)                                   | 0.044 |
| Onset of circulatory failure,<br>M(IQR) | 3(2)                        | 3(2)                            | 3(1)                                   | 0.700 |

|                                   |           |           |           |       |
|-----------------------------------|-----------|-----------|-----------|-------|
| Duration of organ failure, M(IQR) | 14(16)    | 14.5(10)  | 9(22)     |       |
| 48 hours to 1 week, N(%)          | 32(41.56) | 11(32.35) | 21(48.84) |       |
| 1–2 weeks, N(%)                   | 8(10.39)  | 6(17.65)  | 2(4.65)   | 0.028 |
| 2–3 weeks, N(%)                   | 32(41.56) | 17(50.00) | 15(34.88) |       |
| >3 weeks, N(%)                    | 5(6.49)   | 0(0)      | 5(11.63)  |       |
| Single organ failure, N(%)        | 55(29.57) | 20(27.40) | 35(30.97) | 0.102 |
| Onset of single organ failure     |           |           |           |       |
| First week(>48 hours), N(%)       | 72(92.31) | 34(100)   | 38(86.36) |       |
| Second week, N(%)                 | 3(3.85)   | 0(0)      | 3(6.82)   | 0.774 |
| Third or fourth week, N(%)        | 0(0)      | 0(0)      | 0(0)      |       |
| Fifth week or later, N(%)         | 3(3.85)   | 0(0)      | 3(6.82)   |       |
| Multiple organ failure, N(%)      | 24(12.90) | 14(19.18) | 10(8.85)  | 0.056 |
| Onset of multiple organ failure   |           |           |           |       |
| First week(>48 hours), N(%)       | 22(91.67) | 12(85.71) | 10(100)   |       |
| Second week, N(%)                 | 2(8.33)   | 2(14.29)  | 0(0)      | 0.021 |
| Third or fourth week, N(%)        | 0(0)      | 0(0)      | 0(0)      |       |
| Fifth week or later, N(%)         | 0(0)      | 0(0)      | 0(0)      |       |
| POF pre-operation, N(%)           | 30(16.13) | 17(23.29) | 13(11.50) | 0.033 |

POF, persistent organ failure; M(IQR), median and inter-quartile range for quantitative data; N(%), number and percentage for categorical variables; a indicates the survival after operation; b indicates the time from the onset of acute pancreatitis to surgical intervention.

**Supplementary Table 2.** Infection and other baseline characteristics for survived patients after early (<4 weeks) or delayed surgery ( $\geq 4$  weeks).

| Characteristic                               | All <sup>a</sup><br>(N=186) | <4 weeks <sup>b</sup><br>(N=73) | $\geq 4$ weeks <sup>b</sup><br>(N=113) | P      |
|----------------------------------------------|-----------------------------|---------------------------------|----------------------------------------|--------|
| Age(years), M(IQR)                           | 43(17)                      | 41(12)                          | 45(17)                                 | 0.166  |
| Male, N(%)                                   | 115(61.83)                  | 45(61.64)                       | 70(61.95)                              | 0.967  |
| Length of stay(days), M(IQR)                 | 25(32)                      | 24(30)                          | 26(34)                                 | 0.931  |
| Time (days) from onset<br>to surgery, M(IQR) | 32(20)                      | 21(6)                           | 37(21)                                 | <0.001 |
| CRRT, N(%)                                   | 17(9.14)                    | 12(16.44)                       | 5(4.42)                                | 0.006  |
| Infected necrosis, N(%)                      | 99(53.23)                   | 26(38.36)                       | 71(62.83)                              | 0.001  |
| Onset of fever(days), M(IQR)                 | 7(15)                       | 7(11)                           | 9(30)                                  | <0.001 |
| Blood culture, N(%)                          | 16(8.60)                    | 7(9.59)                         | 9(7.96)                                | 0.700  |
| Sputum, N(%)                                 | 30(16.13)                   | 10(13.70)                       | 20(17.70)                              | 0.469  |
| WBC, N(%)                                    | 71(38.17)                   | 30(41.10)                       | 41(36.28)                              | 0.509  |
| CRP                                          |                             |                                 |                                        |        |
| Normal, N(%)                                 | 78(41.94)                   | 28(38.36)                       | 50(44.25)                              |        |
| Mild, N(%)                                   | 4(2.15)                     | 0(0)                            | 4(3.54)                                | 0.206  |
| Moderate, N(%)                               | 13(6.99)                    | 4(5.48)                         | 9(7.96)                                |        |
| Severe, N(%)                                 | 91(48.92)                   | 41(56.16)                       | 50(44.25)                              |        |
| PCT, N(%)                                    | 55(29.57)                   | 24(32.88)                       | 31(27.43)                              | 0.427  |
| IL-6, N(%)                                   | 44(23.66)                   | 11(15.07)                       | 33(29.20)                              | 0.027  |

|                                               |           |           |          |        |
|-----------------------------------------------|-----------|-----------|----------|--------|
| Modified Marshall score on admission, M(IQR)  | 1(3)      | 1(3)      | 1(2)     | 0.122  |
| Modified Marshall score pre-operation, M(IQR) | 0(1)      | 0(1)      | 0(0)     | 0.009  |
| Postoperative complications                   |           |           |          |        |
| Intra-abdominal bleeding, N(%)                | 23(12.37) | 16(21.92) | 7(6.19)  | 0.002  |
| Enterocutaneous fistula, N(%)                 | 20(10.75) | 9(12.33)  | 11(9.73) | 0.577  |
| New-onset organ failure, N(%)                 | 14(7.53)  | 8(10.96)  | 6(5.31)  | 0.154  |
| Re-intervention, N(%)                         | 19(10.22) | 17(23.29) | 2(1.77)  | <0.001 |

M(IQR), median and inter-quartile range for quantitative data; N(%), number and percentage for categorical variables; CRRT, continuous renal replacement therapy; WBC, white blood cell; CRP, C-reactive protein; PCT, procalcitonin; IL-6, interleukin 6; a indicates the survival after operation; b indicates the time from the onset of acute pancreatitis to surgical intervention.
